# Supplementary material
Source: Springer Nature journal article supplement (https://www.springermedizin.de/resource/supplementary/13221_2013_51_MOESM1_ESM.pdf/9680890)

**A**

microglial progenitors  
migrate from the yolk sac  
to the embryo and surround  
neuroepithelium

microglia enter  
neuroepithelium  
and associate  
with blood  
vessels

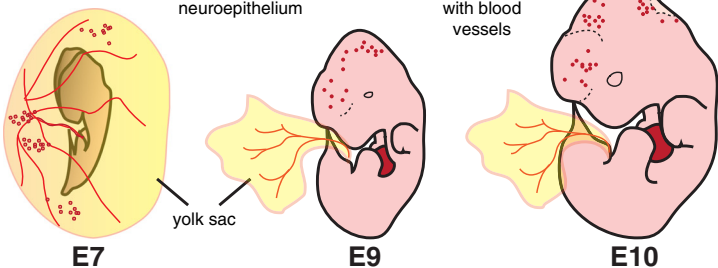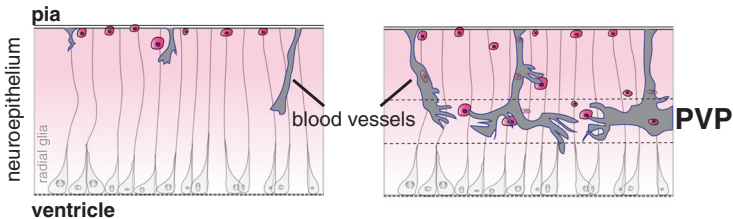**B**

PVP (en face)

control

*Pu.1*<sup>-/-</sup>

CD31 / F4/80 (microglia)

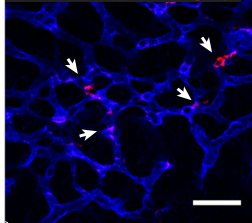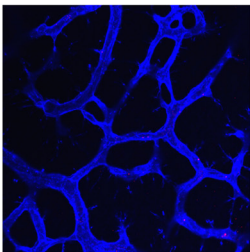

control  
*Pu.1*<sup>-/-</sup>

branches per field

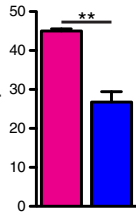

Supplement: MOESM1 [file 9680890]
